# Supplementary material for: A new satellite-derived dataset for marine aquaculture areas in the China's coastal region
Source: Copernicus journal article supplement (doi:10.5194/essd-2020-122), 2020-09-22
Supplement: Supplementary file 1 [file essd-2020-122-supplement.pdf]

# Supplementary Material

## A new satellite-derived dataset for marine aquaculture in the China's coastal region

Yongyong Fu, Jinsong Deng, Hongquan Wang, Alexis Comber, Wu Yang, Wenqiang Wu, Shixue You, Yi Lin, Ke Wang

**Table S1.**Product filename of Gaofen-1 wide-field-of-view images used in this study.

|                                              |
|----------------------------------------------|
| GF1_WFV3_E122.0_N38.9_20161227_L1A0002074683 |
| GF1_WFV1_E120.5_N31.3_20171218_L1A0002859977 |
| GF1_WFV3_E118.2_N37.3_20171219_L1A0002863055 |
| GF1_WFV4_E120.1_N36.9_20171219_L1A0002863046 |
| GF1_WFV4_E120.7_N38.6_20171219_L1A0002863047 |
| GF1_WFV3_E118.6_N38.9_20171219_L1A0002863060 |
| GF1_WFV4_E121.2_N40.2_20171219_L1A0002863045 |
| GF1_WFV3_E119.1_N40.6_20171219_L1A0002863057 |
| GF1_WFV2_E121.6_N27.6_20171226_L1A0002880173 |
| GF1_WFV2_E122.0_N29.3_20171226_L1A0002880171 |
| GF1_WFV2_E122.4_N30.9_20171226_L1A0002880170 |
| GF1_WFV2_E117.9_N24.2_20180112_L1A0002925336 |
| GF1_WFV2_E111.7_N21.7_20180113_L1A0002928365 |
| GF1_WFV3_E113.0_N21.3_20180117_L1A0002938795 |
| GF1_WFV3_E113.2_N22.2_20180117_L1A0002938789 |
| GF1_WFV3_E117.5_N23.9_20180331_L1A0003095464 |
| GF1_WFV2_E115.3_N22.6_20180331_L1A0003095449 |
| GF1_WFV1_E119.1_N24.7_20180213_L1A0003000815 |
| GF1_WFV2_E121.0_N29.3_20180205_L1A0002983866 |
| GF1_WFV2_E124.1_N39.3_20180428_L1A0003150542 |
| GF1_WFV1_E107.8_N21.3_20180920_L1A0003465357 |
| GF1_WFV4_E119.5_N35.1_20180113_L1A0002928329 |
| GF1_WFV1_E121.5_N36.4_20180213_L1A0003000817 |
| GF1_WFV1_E119.4_N26.3_20180213_L1A0003000826 |
| GF1_WFV1_E119.8_N28.0_20180213_L1A0003000822 |
| GF1_WFV1_E120.8_N33.0_20180213_L1A0003000824 |
| GF1_WFV3_E110.9_N20.5_20190320_L1A0003894550 |
| GF1_WFV2_E109.3_N20.9_20180328_L1A0003089485 |
| GF1_WFV3_E117.1_N22.2_20180331_L1A0003095468 |
| GF1_WFV3_E110.3_N18.9_20180508_L1A0003170461 |
| GF1_WFV2_E122.4_N37.6_20180519_L1A0003199301 |
| GF1_WFV3_E109.2_N22.2_20181007_L1A0003504366 |

|                                              |
|----------------------------------------------|
| GF1_WFV4_E111.0_N21.9_20181007_L1A0003504391 |
| GF1_WFV2_E108.8_N19.2_20190320_L1A0003895436 |
| GF1_WFV2_E109.4_N17.5_20190328_L1A0003909417 |
